# Supplementary material for: Entwicklung und Validierung eines Fragebogens zur Erfassung von Sportinteressen im Jugendalter (SPIT)
Source: Atypon-hosted journal article supplement (doi:10.1026/1612-5010/a000202), 2017-10-01
Supplement: 1612-5010_a000202_esm1.pdf [file 1612-5010_a000202_esm1.pdf]

## **Erfassung der Anforderungsstruktur einzelner Sportarten:**

### **Methodisches Vorgehen und Abklärungen zur Interrater-Reliabilität**

Hollands (1997) Person-Umwelt-Passungstheorie postuliert, dass ein Individuum umso zufriedener und erfolgreicher ist, je besser die Umwelt, in der es tätig ist, zu seinen Interessen passt. Vor diesem Hintergrund bietet es sich zur Validierung des SPIT grundsätzlich an, die Passung von individuellen Sportinteressen und sportlichem Umfeld, genauer: ausgeübten Sportarten, zu untersuchen. Aber während im Berufskontext in Form von Berufsregistern Angaben dazu vorliegen, welche Inhalte und Anforderungen im Spiegel der Holland-Dimensionen mit einer großen Zahl von Berufen verbunden sind (s. z. B. Bergmann & Eder, 2005; Holland, 1997), und damit Studien zur Passung von Person und Umwelt möglich sind, sind im Sportkontext keine vergleichbaren Kompendien vorhanden. Wir versuchten deshalb in einer separaten Studie, einige Merkmale der Anforderungsstruktur sportlicher Tätigkeiten herauszuarbeiten, zu denen mit Nitsch (z. B. 2004, 2009) zum einen die Anforderungen gezählt werden können, die eine Sportart stellt (Aufgabenfaktor), und zum anderen auch die Opportunities (Möglichkeiten), die der Umwelt beim Ausüben einer Sportart innewohnen (Umweltfaktor). Ziel war es letztlich, die so verstandene Anforderungsstruktur einer Reihe von Sportarten zu beschreiben, wobei dies unter Verwendung derselben Konzepte geschehen sollte, die auch dem SPIT und seinen Dimensionen zugrunde liegen. In diesem elektronischen Supplement werden das methodische Vorgehen dieser Studie und Ergebnisse zur Interrater-Reliabilität der entwickelten Anforderungsdimensionen dargelegt.

### **Methode**

Zur Erfassung der Anforderungsstruktur von Sportarten wurde das Q-Sort-Verfahren (Müller & Kals, 2004) eingesetzt, und zwar bei einer Stichprobe von 36 Personen. Sie hatten dem Kriterium zu genügen, in Theorie und Praxis mit der gesamten Breite sportlicher Tätigkeiten vertraut zu sein und über einen perspektivischen Überblick zu verfügen – im Gegensatz zu Personen mit einer großen Expertise in einem beschränkten Ausschnitt von Sportarten. Durch das Beiziehen von Generalistinnen und Generalisten sollte möglichst sichergestellt werden, dass aus einer gewissen Distanz Quervergleiche zwischen den Sportarten angestellt werden können. Die Stichprobe setzte sich zusammen aus ausgebildeten bzw. angehenden Sportwissenschaftlerinnen und Sportwissenschaftlern, d. h. Dozierenden und fortgeschrittenen Masterstudierenden zweier sportwissenschaftlicher Hochschulinstitute. Ihre Aufgabe bestand darin, eine Stichprobe von Sportarten unter dem

Aspekt ihrer Anforderungsstruktur zu beurteilen, d. h. die Anforderungen, welche die Sportarten stellen, bzw. die Opportunities, welche die Umwelt beim Ausüben einer Sportart bieten. Die Beurteilungsdimensionen nahmen die 13 Dimensionen der allgemeinen und spezifischen Sportinteressen auf. Konkret wurden die intellektuellen, ästhetischen und sozialen Anforderungen erfragt sowie die Möglichkeiten hinsichtlich Aggressivität, Abenteuer (im Sinne von Risiko und physischer Gefahr), (Kontakt mit der) Natur, Wettkampf und Spontaneität. Ferner wurden die Anforderungen bezüglich (körperlicher) Ausdauer, (Bewegungs-)Schnelligkeit, Koordination, Kraft sowie Fitness erfasst.

Die Stichprobe der Sportarten bildeten jene 95 mehr oder minder gängigen und jugendgerechten Sportarten, die zum Erhebungszeitpunkt im Rahmen von Jugend und Sport organisiert waren, der zentralen schweizerischen Institution für Sportförderung im Jugendalter. So gehörten beispielsweise Aikido, Badminton, Baseball oder Basketball dazu, aber nicht Basejumping, Boxen, Jai Alai, Motorbootsport oder Polo.

Die Untersuchungspersonen hatten die Sportarten nach dem Ausmaß der Anforderungen bzw. Opportunities auf einer neunstufigen Skala einzuordnen, die von *relativ gering* (1) bis *relativ hoch* (9) reichte. Zusätzlich war die Antwortkategorie *nicht zuordenbar* vorgesehen. (Beispiel-Item: „Im Spiegel aller Konditionsfaktoren: Welche Sportarten stellen relativ geringe, welche relativ hohe Anforderungen an die körperliche Fitness? Bitte ordnen Sie die einzelnen Sportarten in dieser Hinsicht auf der Skala an.“) Nach der Beurteilung aller vorgelegten Sportarten hinsichtlich einer Dimension wurden die Untersuchungspersonen gebeten, auf einer fünfstufigen Skala anzugeben, wie schwierig es war, die Zuordnung vorzunehmen (1 = *nicht schwierig*, ..., 5 = *sehr schwierig*). Da das Q-Sort-Verfahren viel Zeit in Anspruch nimmt (ca. 20 bis 30 Minuten pro Dimension), wurde für die Raterinnen und Rater die Anzahl der zu beurteilenden Dimensionen auf vier limitiert.

Die Raterinnen und Rater wurde in einem 30-minütigen Briefing in ihre Aufgabe eingewiesen. Es umfasste die inhaltliche Klärung der relevanten Konstrukte sowie den Umgang mit einer zentralen Schwierigkeit des Ratingverfahrens, nämlich der Tatsache, dass ein und dieselbe Sportart recht unterschiedlich ausgeübt werden kann: Zum Beispiel ist es möglich, unterschiedlich „kraftvoll“ Badminton zu spielen. Und unter dem Aspekt der Kraft betrachtet erfordert wettkampforientiertes Badminton auf hohem Leistungsniveau sicher mehr Kraft als freizeitorientiertes Badminton. Die Raterinnen und Rater wurden instruiert, möglichst von diesen – zweifellos realen – Unterschieden innerhalb einer Sportart abzusehen und die Unterschiede zwischen den Sportarten zu fokussieren, wie sie sich bei einer

„durchschnittlichen“ Ausübung zeigen. Sie sollten also vor dem Hintergrund dieser Vorgabe z. B. „durchschnittliches“ Badminton z. B. mit „durchschnittlichem“ Gewichtheben vergleichen – und aller Voraussicht nach zur Einschätzung gelangen, dass Badminton alles in allem weniger Kraft erfordert als Gewichtheben.

Zur Bestimmung der Reliabilität dieser Urteile wurde der Intra-Klassen-Koeffizient (ICC) bestimmt, der nicht nur die gemeinsame Varianz der Raterinnen und Rater berücksichtigt, sondern auch allfällige Niveau-Unterschiede zwischen ihnen (z. B. Diehl & Staufenbiel, 2007). Der ICC gibt die Reliabilität der über alle Raterinnen und Rater gemittelten Urteile an.

### **Ergebnisse und Diskussion**

Der Überblick über die Ergebnisse (s. Tabelle 1) zeigt, dass letztlich das Set von 95 Sportarten von minimal 10 bis maximal 13 Personen hinsichtlich einer bestimmten Dimension eingestuft wurde. Generell ist zu konstatieren, dass das Rating der Sportarten unter dem Aspekt der erforderlichen Ausdauer, Schnelligkeit, Koordination, Kraft und Fitness als relativ schwierig erachtet wurde. Die gemittelte Schwierigkeit ( $M$ ) beim Rating dieser fünf Aspekte belief sich auf 3.82 ( $SD = 0.44$ ), während der Mittelwert der übrigen acht Aspekte 3.32 betrug ( $SD = 0.42$ ,  $d = 1.16$ ). Am schwierigsten war das Rating hinsichtlich Fitness ( $M = 4.36$ ), am einfachsten dasjenige hinsichtlich Ästhetik ( $M = 2.62$ ). Dies könnte darin begründet sein, dass die Sportarten bezüglich der Anforderungen in den Konditionsfaktoren homogener sind als in Bezug auf die übrigen. So setzen sich beispielsweise die ästhetisch-kompositorischen Sportarten recht deutlich von den übrigen Sportarten ab, während jede Sportart zumindest ein gewisses Maß an körperlicher Fitness erfordert und es für die Raterinnen und Rater äußerst schwierig ist, das Ausmaß zu isolieren, in dem die unterschiedlichen Facetten von körperlicher Fitness (Ausdauer, Schnelligkeit, Kraft und Koordination) für die Ausübung einer Sportart erforderlich sind.

Der ICC der einzelnen Dimensionen ist ebenfalls in Tabelle 1 wiedergegeben. Die höchste Interrater-Reliabilität ergab sich für die Dimension Natur (.97), aber auch in der schwierig zu beurteilende Dimension Fitness fiel der ICC mit .93 hoch aus. Am geringsten war die Interrater-Reliabilität im Fall der konzeptuell relativ unscharfen Dimension Spontaneität (.86), aber sie ist den gängigen Konventionen zufolge (Eid & Schmidt, 2014) immer noch sehr zufriedenstellend. Auffällig ist diese hohe Übereinstimmung deshalb, weil die Beurteilung auf einem hohen Abstraktionsniveau vorzunehmen war und aller Expertise zum Trotz die Raterinnen und Rater wohl nicht jede Sportart im Detail kannten.

Tabelle 1

*Anforderungsstruktur von Sportarten: Kennwerte der Einstufung auf 13 Dimensionen*

| Dimension (Beispiele von Sportarten mit tiefen bzw. hohen Ausprägungen) | <i>n</i> | Schwierigkeit des Ratings |           | ICC | 95%-KI ICC |
|-------------------------------------------------------------------------|----------|---------------------------|-----------|-----|------------|
|                                                                         |          | <i>M</i>                  | <i>SD</i> |     |            |
| Aggressivität<br>(Freitauchen – Rugby)                                  | 12       | 2.75                      | 0.87      | .95 | [.93, .97] |
| Abenteuer <sup>a</sup><br>(Golf – Mountainbike Downhill)                | 13       | 3.26                      | 0.84      | .90 | [.86, .93] |
| Natur<br>(Geräteturnen – Skitouren)                                     | 10       | 3.56                      | 1.22      | .97 | [.95, .98] |
| Intellekt<br>(Rudern – Orientierungslauf)                               | 13       | 3.85                      | 0.55      | .89 | [.86, .92] |
| Ästhetik<br>(Short Track – Eiskunstlauf)                                | 13       | 2.62                      | 0.77      | .97 | [.95, .98] |
| Gemeinschaft<br>(Wasserspringen – Eishockey)                            | 10       | 3.32                      | 0.97      | .96 | [.94, .97] |
| Wettkampf<br>(Wandern – Leichtathletik)                                 | 13       | 3.72                      | 1.14      | .93 | [.90, .95] |
| Spontaneität<br>(Eisschnellauf – Tennis)                                | 13       | 3.44                      | 1.09      | .86 | [.82, .90] |
| Ausdauer<br>(Curling – Skilanglauf)                                     | 10       | 3.20                      | 1.03      | .95 | [.93, .97] |
| (Bewegungs-)Schnelligkeit<br>(Sportschiessen – Fechten)                 | 12       | 3.80                      | 0.66      | .93 | [.91, .95] |
| Koordination<br>(Wandern – Kunstturnen)                                 | 10       | 4.00                      | 0.94      | .93 | [.91, .95] |
| Kraft<br>(Sportschiessen – Schwingen)                                   | 12       | 3.72                      | 0.93      | .92 | [.89, .94] |
| Fitness<br>(Curling – Triathlon)                                        | 11       | 4.36                      | 0.67      | .93 | [.91, .95] |

*Anmerkungen.* *N* = 36 Raterinnen und Rater. Die Schwierigkeit der Zuordnung wurde auf einer fünfstufigen Skala beurteilt (1 = *nicht schwierig*, ..., 5 = *sehr schwierig*). ICC: Intraklassenkorrelationskoeffizient (s. z. B. Diehl & Staufbenbiel, 2007). 95%-KI ICC: 95%-Konfidenzintervall für den ICC.

<sup>a</sup> In Bezug auf die Dimension *Abenteuer* wurde wie folgt gefragt: „Wie groß ist die Gefahr bei den einzelnen Sportarten, dass man dabei Verletzungen und/oder gesundheitliche Schäden durch Selbst- oder Fremdeinwirkung erleidet?“

Zur Bestimmung der Anforderungsstruktur der einzelnen Sportart wurden die Urteile der Raterinnen und Rater pro Sportart gemittelt. Es entstand ein Sportartenregister, d. h. eine 95 Sportarten × 13 Dimensionen-Kreuztabelle. Beispielhaft sind in Tabelle 1 zu den einzelnen Dimensionen jeweils Sportarten mit einer sehr geringen oder sehr hohen Ausprägung auf den jeweiligen Dimensionen vermerkt. Die wenigen wiedergegebenen Beispiele entsprechen dabei durchaus dem Stereotyp einer z. B. aggressiven, naturnahen, artistischen oder koordinativ anforderungsreichen Sportart. Die genannten Beispiele sind nicht zahlreich und zudem auf jeweils eine Dimension beschränkt, so dass die Anforderungsstruktur der einzelnen Sportarten nur schemenhaft wahrnehmbar wird. Aber gleichwohl ist es so, dass diese Beispiele recht plausibel erscheinen. Wir schließen daraus,

dass man auch der mehrdimensionalen Anforderungsstruktur, die wir für die einzelnen Sportarten entwickelt haben, nicht rundweg Augenscheinvalidität absprechen muss.

### Literatur

- Diehl, J. M. & Staufenbiel, T. (2007). *Statistik mit SPSS Version 15*. Eschborn bei Frankfurt a. M.: Dietmar Klotz.
- Eid, M. & Schmidt, K. (2014). *Testtheorie und Testkonstruktion*. Göttingen: Hogrefe.
- Müller, F. H. & Kals, E. (2004). Die Q-Methode. Ein innovatives Verfahren zur Erhebung subjektiver Einstellungen und Meinungen [69 Absätze]. *Forum Qualitative Sozialforschung/Forum: Qualitative Social Research*, 5(2), Art. 34, <http://nbn-resolving.de/urn:nbn:de:0114-fqs0402347>
- Nitsch, J. R. (2004). Handlungstheoretische Grundlagen der Sportpsychologie. In H. Gabler, J. R. Nitsch & R. Singer (Hrsg.), *Einführung in die Sportpsychologie: Teil I. Grundthemen* (4. Aufl., S. 43–164). Schorndorf: Hofmann.
- Nitsch, J. R. (2009). Ecological approaches to sport activity: A commentary from an action-theoretical point of view. *International Journal of Sport Psychology*, 40, 152–176.
