# Supplementary material for: Entwicklung und Validierung eines Fragebogens zur Erfassung von Sportinteressen im Jugendalter (SPIT)
Source: Atypon-hosted journal article supplement (doi:10.1026/1612-5010/a000202), 2017-10-01
Supplement: 1612-5010_a000202_esm2.pdf [file 1612-5010_a000202_esm2.pdf]

Tabelle 1

Statistiken der SPIT-Items die Entwicklungsstichprobe ( $n_1 = 400$ , Pool mit 77 Items) und die Validierungsstichprobe ( $n_2 = 843$ ; Pool mit 69 Items)

| Item-Nummer und -Text                                                                    | Entwicklungsstichprobe |           |         |          |                                                   | Validierungsstichprobe                            |
|------------------------------------------------------------------------------------------|------------------------|-----------|---------|----------|---------------------------------------------------|---------------------------------------------------|
|                                                                                          | <i>M</i>               | <i>SD</i> | Schiefe | Kurtosis | <i>Trennschärfe</i><br>( <i>r</i> <sub>it</sub> ) | <i>Trennschärfe</i><br>( <i>r</i> <sub>it</sub> ) |
| Item-Stamm: „Wenn ich eine Sportart ausübe, möchte ich ...“                              |                        |           |         |          |                                                   |                                                   |
| <b>Aggressivität</b>                                                                     |                        |           |         |          |                                                   |                                                   |
| 11. einen Gegner verdrängen müssen                                                       | 2.69                   | 0.92      | -0.17   | -0.82    | .63                                               | .64                                               |
| 31. angreifen können                                                                     | 2.92                   | 1.00      | -0.53   | -0.81    | .74                                               | .70                                               |
| 49. körperlich aggressiv sein können                                                     | 2.70                   | 1.03      | -0.22   | -1.11    | .70                                               | .65                                               |
| 93. mich verteidigen müssen                                                              | 2.71                   | 0.94      | -0.21   | -0.87    | .60                                               | .59                                               |
| 108. auch mal Schläge austeilen                                                          | 2.31                   | 1.16      | 0.25    | -1.40    | .63                                               | .49                                               |
| 151. <sup>†</sup> dass es auch mal etwas gröber zu- und hergeht                          | 2.82                   | 1.01      | -0.40   | -0.96    | .70                                               |                                                   |
| <b>Abenteuer</b>                                                                         |                        |           |         |          |                                                   |                                                   |
| 27. es immer wieder mit ganz neuen Situationen zu tun bekommen                           | 3.07                   | 0.76      | -0.39   | -0.47    | .28                                               | .38                                               |
| 34. auch mal in Situationen geraten, in denen man seine Angst überwinden muss            | 2.99                   | 0.88      | -0.54   | -0.46    | .67                                               | .72                                               |
| 43. meinen Mut testen                                                                    | 2.89                   | 0.90      | -0.37   | -0.72    | .66                                               | .70                                               |
| 58. <sup>†</sup> in Situationen geraten, in denen auch mal ein Schaden entstehen könnte  | 2.55                   | 0.96      | 0.04    | -0.99    | .51                                               |                                                   |
| 94. auch mal eine sehr gefährliche Situation erleben                                     | 2.66                   | 1.03      | -0.15   | -1.14    | .72                                               | .58                                               |
| <b>Natur</b>                                                                             |                        |           |         |          |                                                   |                                                   |
| 45. wenn möglich an der frischen Luft sein                                               | 3.25                   | 0.79      | -0.84   | 0.10     | .45                                               | .41                                               |
| 59. <sup>a</sup> in einem Gebäude sein                                                   | 2.29                   | 0.87      | 0.09    | -0.76    | -.41                                              | -.21                                              |
| 90. <sup>b</sup> dass auch Leute gut mitmachen können, die nicht gerne in der Natur sind | 2.56                   | 0.97      | -0.08   | -0.97    | -.15                                              | .16                                               |
| 141. in der Natur sein                                                                   | 2.87                   | 0.91      | -0.30   | -0.83    | .56                                               | .49                                               |

| Item-Nummer und -Text                                                        | Entwicklungsstichprobe |           |         |          |                                                  | Validierungsstichprobe                           |
|------------------------------------------------------------------------------|------------------------|-----------|---------|----------|--------------------------------------------------|--------------------------------------------------|
|                                                                              | <i>M</i>               | <i>SD</i> | Schiefe | Kurtosis | <i>Trennschärfe</i><br>( <i>r<sub>it</sub></i> ) | <i>Trennschärfe</i><br>( <i>r<sub>it</sub></i> ) |
| Item-Stamm: „Wenn ich eine Sportart ausübe, möchte ich ...“                  |                        |           |         |          |                                                  |                                                  |
| <b>Intellekt</b>                                                             |                        |           |         |          |                                                  |                                                  |
| 10. Köpfchen brauchen                                                        | 2.88                   | 0.82      | -0.41   | -0.31    | .51                                              | .49                                              |
| 33.† auch mal Theorie büffeln                                                | 1.85                   | 0.91      | 0.76    | -0.45    | .63                                              |                                                  |
| 37. Dinge ganz genau durchdenken                                             | 2.44                   | 0.82      | 0.12    | -0.50    | .58                                              | .63                                              |
| 70. auch mal etwas auswendig lernen (z.B. Spielregeln, Routen, Vorschriften) | 2.22                   | 0.97      | 0.21    | -1.03    | .61                                              | .60                                              |
| 96.† vorausdenken, was kommen könnte                                         | 2.83                   | 0.83      | -0.41   | -0.30    | .52                                              |                                                  |
| 102. auch mal etwas im Kopf berechnen müssen                                 | 1.99                   | 0.92      | 0.59    | -0.55    | .57                                              | .55                                              |
| 106. verschiedene Techniken, Strategien oder Taktiken lernen                 | 3.08                   | 0.88      | -0.76   | -0.10    | .50                                              | .60                                              |
| 110. immer wieder neue Zusammenhänge verstehen                               | 2.56                   | 0.81      | -0.20   | -0.45    | .58                                              | .54                                              |
| 129. immer wieder verschiedene Situationen genau studieren                   | 2.42                   | 0.82      | 0.07    | -0.54    | .62                                              | .61                                              |
| <b>Ästhetik</b>                                                              |                        |           |         |          |                                                  |                                                  |
| 87. eine Show vorbereiten                                                    | 2.12                   | 1.03      | 0.49    | -0.92    | .62                                              | .67                                              |
| 121. mit Bewegungen ein Musikstück interpretieren                            | 2.23                   | 1.12      | 0.33    | -1.29    | .74                                              | .75                                              |
| 117. elegante Bewegungen ausführen                                           | 2.39                   | 1.02      | 0.09    | -1.12    | .61                                              | .54                                              |
| 148. wie ein Tänzer oder eine Tänzerin auftreten                             | 1.94                   | 1.10      | 0.77    | -0.83    | .79                                              | .76                                              |
| <b>Gemeinschaft</b>                                                          |                        |           |         |          |                                                  |                                                  |
| 66. in einem festen Team sein                                                | 3.06                   | 0.89      | -0.58   | -0.56    | .23                                              | .16                                              |
| 73. mit anderen zusammenarbeiten                                             | 3.30                   | 0.72      | -0.84   | 0.46     | .78                                              | .72                                              |
| 89. für den Zusammenhalt einer Gruppe sorgen                                 | 2.98                   | 0.87      | -0.59   | -0.28    | .72                                              | .68                                              |
| 99. mit anderen zusammen sein                                                | 3.40                   | 0.73      | -1.13   | 1.02     | .75                                              | .66                                              |
| 116. Teamgeist erleben                                                       | 3.38                   | 0.80      | -1.18   | 0.78     | .82                                              | .76                                              |
| 127. ein Gruppenziel verfolgen                                               | 3.06                   | 0.87      | -0.68   | -0.24    | .79                                              | .76                                              |

| Item-Nummer und -Text                                                             | Entwicklungsstichprobe |           |         |          |                                                  | Validierungsstichprobe                           |
|-----------------------------------------------------------------------------------|------------------------|-----------|---------|----------|--------------------------------------------------|--------------------------------------------------|
|                                                                                   | <i>M</i>               | <i>SD</i> | Schiefe | Kurtosis | <i>Trennschärfe</i><br>( <i>r<sub>it</sub></i> ) | <i>Trennschärfe</i><br>( <i>r<sub>it</sub></i> ) |
| Item-Stamm: „Wenn ich eine Sportart ausübe, möchte ich ...“                       |                        |           |         |          |                                                  |                                                  |
| <b>Wettkampf</b>                                                                  |                        |           |         |          |                                                  |                                                  |
| 25. meine Leistung mit anderen vergleichen können                                 | 2.72                   | 0.88      | -0.28   | -0.60    | .67                                              | .67                                              |
| 50. dass dabei ein Wettkampf im Vordergrund steht                                 | 2.43                   | 1.02      | 0.13    | -1.09    | .60                                              | .59                                              |
| 72.† einen Kampfrichter, Punkrichter oder Schiedsrichter haben                    | 2.73                   | 1.02      | -0.23   | -1.09    | .52                                              |                                                  |
| 128. dass ich mich beim Training mit anderen vergleichen kann                     | 2.83                   | 0.91      | -0.39   | -0.66    | .73                                              | .67                                              |
| 136. die Möglichkeit haben, zu gewinnen                                           | 3.21                   | 0.93      | -0.97   | -0.05    | .66                                              | .59                                              |
| 145. immer genau wissen, wie gut meine Leistung ist                               | 2.81                   | 0.87      | -0.29   | -0.61    | .53                                              | .57                                              |
| 155. mein Können mit einem Gegner vergleichen                                     | 2.81                   | 0.94      | -0.38   | -0.75    | .74                                              | .72                                              |
| <b>Spontaneität</b>                                                               |                        |           |         |          |                                                  |                                                  |
| 54. in kürzester Zeit aus vielen Handlungsmöglichkeiten auswählen müssen          | 2.56                   | 0.82      | 0.07    | -0.57    | .49                                              | .47                                              |
| 69. verschiedene Tricks ausprobieren können                                       | 3.26                   | 0.77      | -0.81   | 0.15     | .58                                              | .53                                              |
| 71. immer wieder spontan neue Handlungen ausprobieren können                      | 2.96                   | 0.76      | -0.36   | -0.25    | .45                                              | .60                                              |
| 75. Überraschungseffekte einsetzen                                                | 3.04                   | 0.82      | -0.46   | -0.48    | .58                                              | .56                                              |
| 100. dass es wichtig ist, sehr schnell Entscheidungen zu treffen                  | 2.82                   | 0.84      | -0.22   | -0.63    | .60                                              | .51                                              |
| 137. dass es wichtig ist, spontan zu handeln                                      | 2.96                   | 0.77      | -0.30   | -0.43    | .56                                              | .59                                              |
| <b>Ausdauer</b>                                                                   |                        |           |         |          |                                                  |                                                  |
| 20. bis an die Grenzen meiner Ausdauer gehen                                      | 2.91                   | 0.90      | -0.41   | -0.67    | .73                                              | .77                                              |
| 24. etwas tun, bei dem man so richtig außer Atem kommt                            | 2.86                   | 0.91      | -0.32   | -0.76    | .73                                              | .70                                              |
| 29. über eine längere Zeit eine hohe körperliche Leistung erbringen               | 2.96                   | 0.85      | -0.48   | -0.41    | .69                                              | .69                                              |
| 64. körperliche Ausdauer trainieren                                               | 3.25                   | 0.82      | -0.92   | 0.26     | .62                                              | .65                                              |
| 125. meinen Kreislauf auf Hochtouren bringen                                      | 2.95                   | 0.85      | -0.39   | -0.59    | .52                                              | .49                                              |
| 149.† mich so richtig auspowern                                                   | 3.27                   | 0.84      | -1.08   | 0.56     | .61                                              |                                                  |
| <b>(Bewegungs-)Schnelligkeit</b>                                                  |                        |           |         |          |                                                  |                                                  |
| 15. dass auch etwas langsamere Leute gut mitmachen können                         | 2.53                   | 0.90      | 0.01    | -0.77    | .51                                              | .51                                              |
| 78. <sup>a</sup> lieber langsame als schnelle Bewegungen ausführen                | 2.08                   | 0.87      | 0.47    | -0.47    | .62                                              | .70                                              |
| 91. etwas machen, bei dem schnelle Bewegungen wichtig sind                        | 2.85                   | 0.81      | -0.25   | -0.54    | -.51                                             | -.71                                             |
| 114.† eine schnelle Beschleunigung trainieren                                     | 2.73                   | 0.90      | -0.13   | -0.83    | -.25                                             |                                                  |
| 134. <sup>b</sup> dass es nicht so auf die Geschwindigkeit der Bewegungen ankommt | 2.28                   | 0.85      | 0.18    | -0.60    | .46                                              | .51                                              |
| 146. <sup>a</sup> etwas eher Langsames machen                                     | 1.94                   | 0.81      | 0.59    | -0.16    | .63                                              | .70                                              |

| Item-Nummer und -Text                                                 | Entwicklungsstichprobe |           |         |          |                                                  | Validierungsstichprobe                           |
|-----------------------------------------------------------------------|------------------------|-----------|---------|----------|--------------------------------------------------|--------------------------------------------------|
|                                                                       | <i>M</i>               | <i>SD</i> | Schiefe | Kurtosis | <i>Trennschärfe</i><br>( <i>r<sub>it</sub></i> ) | <i>Trennschärfe</i><br>( <i>r<sub>it</sub></i> ) |
| Item-Stamm: „Wenn ich eine Sportart ausübe, möchte ich ...“           |                        |           |         |          |                                                  |                                                  |
| <b>Koordination</b>                                                   |                        |           |         |          |                                                  |                                                  |
| 23. dass ich z.B. die Arme oder Beine total beherrschen muss          | 2.99                   | 0.80      | -0.45   | -0.29    | .57                                              | .54                                              |
| 57. dass man viele verschiedene Bewegungen ausführen muss             | 2.95                   | 0.80      | -0.50   | -0.11    | .58                                              | .54                                              |
| 86. dass man von einer Bewegung schnell auf eine andere wechseln muss | 2.84                   | 0.83      | -0.32   | -0.46    | .62                                              | .59                                              |
| 88. <sup>†</sup> dass man die Bewegungen ganz genau ausführen muss    | 2.52                   | 0.91      | 0.04    | -0.80    | .56                                              |                                                  |
| 101. dass man verschiedene Bewegungen miteinander verbinden muss      | 2.90                   | 0.81      | -0.37   | -0.38    | .60                                              | .56                                              |
| 142. dass man den ganzen Körper gut beherrschen muss                  | 3.13                   | 0.76      | -0.67   | 0.28     | .63                                              | .60                                              |
| <b>Kraft</b>                                                          |                        |           |         |          |                                                  |                                                  |
| 1. mit schweren Gewichten umgehen                                     | 1.99                   | 0.85      | 0.54    | -0.36    | .56                                              | .55                                              |
| 38. Dinge mit möglichst viel Kraft bewegen                            | 2.54                   | 0.88      | 0.05    | -0.74    | .77                                              | .77                                              |
| 65. innerhalb kürzester Zeit meine volle Kraft einsetzen              | 2.84                   | 0.92      | -0.30   | -0.82    | .55                                              | .58                                              |
| 133. mich mit großem Krafteinsatz bewegen müssen                      | 2.60                   | 0.85      | 0.05    | -0.69    | .71                                              | .59                                              |
| 144. <sup>b</sup> dass es nicht so auf die Kraft ankommt              | 2.44                   | 0.89      | 0.00    | -0.76    | -.57                                             | -.48                                             |
| <b>Fitness</b>                                                        |                        |           |         |          |                                                  |                                                  |
| 12. eine gute Figur bekommen                                          | 3.28                   | 0.79      | -0.88   | 0.12     | .61                                              | .61                                              |
| 48. meinen Körper formen                                              | 3.15                   | 0.82      | -0.62   | -0.39    | .61                                              | .57                                              |
| 111. viele Kalorien verbrauchen                                       | 3.07                   | 0.92      | -0.73   | -0.35    | .68                                              | .66                                              |
| 118. mein Gewicht reduzieren                                          | 2.82                   | 1.04      | -0.34   | -1.11    | .65                                              | .59                                              |
| 120. etwas für mein Wohlbefinden tun                                  | 3.31                   | 0.71      | -0.90   | 0.85     | .55                                              | .58                                              |
| 124. etwas für meine Gesundheit tun                                   | 3.47                   | 0.66      | -1.12   | 1.11     | .61                                              | .62                                              |
| 159. mich einfach etwas mehr bewegen, als ich es bis jetzt tue        | 3.04                   | 0.89      | -0.62   | -0.41    | .51                                              | .51                                              |

*Anmerkung.* Vorgegeben ist eine vierstufige Antwortskala, deren Stufen verbal verankert sind als *trifft überhaupt nicht zu* (1), *trifft eher nicht zu* (2), *trifft eher zu* (3) und *trifft ganz genau zu* (4).

<sup>a</sup> Negative Item-Polung. <sup>b</sup> Negierende Item-Formulierung. <sup>†</sup> Item, das aufgrund der Ergebnisse der Faktorenanalyse mit der Entwicklungsstichprobe (Doppel- oder Mehrfachladung) im weiteren Prozess der Testentwicklung nicht mehr berücksichtigt wurde.
